# Supplementary material for: Isolation and studies of a thioether-functionalized pyrazole derived Cu(i)-based cyclic trinuclear complex and its coordination polymers with [Cu2I2] and [BiBr3] nodes
Source: Royal Society of Chemistry journal article supplement (doi:10.1039/d1tc02829d), 2021-01-01
Supplement: d1tc02829d1.pdf [file d1tc02829d1.pdf]

Supporting Information

**Isolation and Studies of Thioether-functionalized Pyrazole Derived  
Cu(I)-based Cyclic Trinuclear Complex and Its Coordination  
Polymers with [Cu<sub>2</sub>I<sub>2</sub>] and [BiBr<sub>3</sub>] Nodes**

Zhi-Qing Lin,<sup>‡</sup> Sai-Li Zheng,<sup>‡</sup> Jieying Hu, Hua-Qun Zhou, Zihao Feng, Yonghe He,  
Lai-Hon Chung\*, Jun He\*

*School of Chemical Engineering and Light Industry, Guangdong University of  
Technology, Guangzhou 510006, Guangdong, China*

\* Corresponding author.

<sup>‡</sup> These authors contributed equally to this work.

*E-mail: laihonchung@gdut.edu.cn; junhe@gdut.edu.cn*

## Table of Contents

|                                                                                                                                                                                                       |          |
|-------------------------------------------------------------------------------------------------------------------------------------------------------------------------------------------------------|----------|
| <b>1. Experimental details</b>                                                                                                                                                                        | <b>4</b> |
| <b>2. MOF syntheses</b>                                                                                                                                                                               | <b>6</b> |
| <b>3. Crystallographic data</b>                                                                                                                                                                       | <b>7</b> |
| <b>Table S1.</b> Crystallographic data for the <b>1</b> , <b>2</b> and <b>3</b>                                                                                                                       | 7        |
| <b>Table S2.</b> Selected bond lengths (Å) and bond angles (°) for <b>1</b>                                                                                                                           | 8        |
| <b>Table S3.</b> Selected bond lengths (Å) and bond angles (°) for <b>2</b>                                                                                                                           | 8        |
| <b>Table S4.</b> Selected bond lengths (Å) and bond angles (°) for <b>3</b>                                                                                                                           | 9        |
| <b>4. Additional Figures</b>                                                                                                                                                                          | <b>9</b> |
| <b>Fig. S1</b> The synthetic route for <b>1</b>                                                                                                                                                       | 9        |
| <b>Fig. S2</b> The <sup>1</sup> H NMR spectrum of compound HL in CDCl <sub>3</sub>                                                                                                                    | 10       |
| <b>Fig. S3</b> The <sup>13</sup> C NMR spectrum of compound HL in CDCl <sub>3</sub>                                                                                                                   | 10       |
| <b>Fig. S4</b> The <sup>1</sup> H NMR spectrum of (a) <b>1</b> in CDCl <sub>3</sub> and (b) the same sample standing for two days.                                                                    | 11       |
| <b>Fig. S5</b> The <sup>13</sup> C NMR spectrum of <b>1</b> in CDCl <sub>3</sub>                                                                                                                      | 11       |
| <b>Fig. S6</b> Photographs of an as-made sample of <b>1</b> (a) under ambient light and (b) in dark upon 365-nm UV irradiation.                                                                       | 12       |
| <b>Fig. S7</b> PXRD patterns (Cu Kα, λ = 1.5418 Å) of (a) an as-made sample of <b>1</b> ; (b) a simulation from the single crystal structure of <b>1</b> .                                            | 12       |
| <b>Fig. S8</b> The FT-IR spectra of (a) the ligand HL, (b) an as-made sample of <b>1</b> , (c) an as-made sample of <b>2</b> .                                                                        | 13       |
| <b>Fig. S9</b> PXRD patterns (Cu Kα, λ = 1.5418 Å) of (a) an as-made sample of <b>2</b> ; (b) a simulation from the single crystal structure of <b>2</b> .                                            | 13       |
| <b>Fig. S10</b> Photographs of an as-made sample of <b>2</b> (a) under ambient light and (b) in dark upon 365-nm UV irradiation.                                                                      | 14       |
| <b>Fig. S11</b> Complex <b>1</b> shown by ORTEP diagram of 50% probability with H atoms omitted for clarity (Copper: orchid; Nitrogen: blue; Carbon: grey; Sulfur: orange).                           | 14       |
| <b>Fig. S12</b> The asymmetric unit of <b>2</b> shown by ORTEP diagram of 50% probability with H atoms omitted for clarity (Copper: orchid; Nitrogen: blue; Carbon: grey; Sulfur: orange; Iodine: sea |          |

|                                                                                                                                                                                                                                  |           |
|----------------------------------------------------------------------------------------------------------------------------------------------------------------------------------------------------------------------------------|-----------|
| green).                                                                                                                                                                                                                          | 15        |
| <b>Fig. S13</b> The asymmetric unit of <b>3</b> shown by ORTEP diagram of 50% probability with H atoms omitted for clarity (Copper: orchid; Nitrogen: blue; Carbon: grey; Sulfur: orange; Bismuth: dark purple; Bromine: brown). | 15        |
| <b>Fig. S14</b> Room temperature emission spectra of <b>1</b> in the solid state ( $\lambda_{\text{ex}} = 300\text{--}380$ nm).                                                                                                  | 16        |
| <b>Fig. S15</b> Room temperature excitation spectra of <b>1</b> in the solid state ( $\lambda_{\text{em}} = 630$ and $660$ nm for a and b).                                                                                      | 16        |
| <b>Fig. S16</b> Room temperature emission spectra of (a) the ligand <b>HL</b> in the solid state ( $\lambda_{\text{ex}} = 330$ nm) (b) <b>HL</b> in $\text{CHCl}_3$ , $[\text{HL}] = 2$ mg/mL ( $\lambda_{\text{ex}} = 330$ nm). | 17        |
| <b>Fig. S17</b> Room temperature emission spectra of <b>1</b> in $\text{CHCl}_3$ , ( $\lambda_{\text{ex}} = 390$ nm for <b>[1]</b> of 10, 5, 2.5 mg/mL).                                                                         | 17        |
| <b>Fig. S18</b> Room temperature excitation spectra of <b>2</b> in the solid state ( $\lambda_{\text{em}} = 620$ and $650$ nm for a and b).                                                                                      | 18        |
| <b>5. References</b>                                                                                                                                                                                                             | <b>18</b> |

## 1. Experimental details

**General procedure.** Starting materials, reagents, and solvents were purchased from commercial sources (J&K, Aldrich and Acros) and used without further purification. Elemental analysis was performed with a Vario Micro CUBE CHN elemental analyzer. FT-IR spectra were obtained using a Nicolet Avatar 360 FT-IR spectrophotometer. Nuclear magnetic resonance (NMR) spectra were recorded at 298 K on a 400 MHz Bruker superconducting magnet high-field NMR spectrometer, with working frequencies of 400 MHz for  $^1\text{H}$  and 100 MHz for  $^{13}\text{C}$  nuclei. Chemical shifts are reported in ppm relative to the signals corresponding to the residual non-deuterated solvents, with tetramethylsilane (TMS) as the internal standard. Powder X-ray diffraction data were collected in reflection mode at room temperature on a Rigaku Smart Lab diffractometer with mixture of Cu-K $\alpha$ 1 ( $\lambda = 1.54056\text{\AA}$ ) and Cu-K $\alpha$ 2 ( $\lambda = 1.5418\text{\AA}$ ) radiation. The X-ray tube operated at a voltage of 30 kV and a current of 30 mA. Fluorescence emission spectra were obtained with a FluoroMax-4 fluorescence photometer. Excited state lifetime of **1** and **2** were obtained with Edinburgh FLS980 photoluminescence spectrometer. Fluorescence images were acquired with a Zeiss Observer Z1 Research Microscope.

### Single crystal X-ray crystallography.

For **1**, **2**, and **3**, data collections were conducted on a Bruker AXS SMART APEX CCD system using Mo K $\alpha$  ( $\lambda = 0.71073\text{\AA}$ ) radiation at 100(2) K. All absorption corrections were performed using the SADABS program. The crystals of **1**, **2**, and **3** were immediately placed into grease after removal from the mother liquors. The structures of **1**, **2**, and **3** were solved by direct methods using SHELXTL 6.14.<sup>1</sup> All non-hydrogen atoms were refined anisotropically. All hydrogen atoms were placed in calculated positions and refined in the riding model. All structures were refined by full-matrix least-squares on  $F_o^2$  using SHELXTL 6.14. ORTEP representations were drawn using ORTEP version 2020.1.<sup>2</sup> For summaries of the X-ray crystallographic data, see Tables S1 below. CCDC 2088677–2088679 corresponding to **1–3** contain the supplementary

crystallographic data for this paper. These data can be obtained free of charge from The Cambridge Crystallographic Data Centre via [www.ccdc.cam.ac.uk/datarequest/cif](http://www.ccdc.cam.ac.uk/datarequest/cif).

**Synthesis of 3,5-dimethyl-4-(4-(methylthio)phenyl)-1H-pyrazole (HL).**

3,5-dimethyl-4-iodopyrazole (222 mg, 1.0 mmol), 4-(methylthio)phenylboronic acid (336 mg, 2.0 mmol), tetrakis(triphenylphosphine)palladium (116 mg, 0.1 mmol) and  $K_2CO_3$  (332 mg, 2.4 mmol) were loaded into a 50-mL two-neck round-bottom flask charged with a stirring bar. The flask was evacuated and re-filled by  $N_2$  atmosphere for three cycles and degassed mixture of toluene (20 mL) and EtOH/ $H_2O$  (4 mL, 1:1, v:v) was then transferred into the flask via a cannula. After being stirred at 110 °C for 24 h, the mixture was cooled to room temperature and poured into water (200 mL) and extracted by ethyl acetate (3 × 50 mL). The combined organic layer was then washed by water (3 × 150 mL), dried over anhydrous  $MgSO_4$ , and the organic solvent was removed via rotary evaporation. The residue was further purified by column chromatography (silica gel, eluent: dichloromethane/methanol, 80:1) to afford a white solid (HL, 159 mg, yield 73 % based on 3,5-dimethyl-4-iodopyrazole).  $^1H$  NMR (400 MHz,  $CDCl_3$ )  $\delta$  2.33 (s, 6H), 2.52 (s, 3H), 7.20-7.23 (d, 2H), 7.31-7.33 (d, 2H).  $^{13}C$  NMR (100 MHz,  $CDCl_3$ )  $\delta$  11.59, 16.01, 117.76, 126.83, 128.67, 129.73, 130.80, 132.07, 136.06, 141.76. FT-IR (KBr pellet,  $v/cm^{-1}$ ): 3170.17 (s), 3130.78 (m), 3071.68 (s), 3007.66 (m), 2968.26 (m), 2923.93 (s), 1913.93 (w), 1572.91 (s), 1525.48 (s), 1427.82 (s), 1308.07 (s), 1262.73 (s), 1097.63 (s), 1045.84 (s), 1000.52 (s), 831.65 (s), 753.96 (m), 692.45 (m), 540.31 (s), 494.99(s).

**Synthesis of 1.** To a glass tube,  $Cu(NO_3)_2 \cdot 3H_2O$  (6 mg, 0.025 mmol), HL (5 mg, 0.023 mmol) and acetonitrile/ $H_2O$  (1.25 mL, 1:4, v:v) were added. The mixture was sonicated for 5 min to form a well-dispersed solution. Then the tube was sealed by oxyhydrogen flame and heated at 140 °C in an oven for 24 h, followed by natural cooling to room temperature, during which bulk pale yellow single crystals suitable for single-crystal X ray diffraction were formed. The freshly prepared crystals were wash by acetonitrile (2 mL × 3) and then dried in air to afford the as-made product **2** as bulk pale-yellow block

(Yield: 47%).  $^1\text{H}$  NMR (400 MHz,  $\text{CDCl}_3$ )  $\delta$  2.27 (s, 6H), 2.52 (s, 3H), 7.16-7.18 (d, 2H), 7.28-7.30 (d, 2H).  $^{13}\text{C}$  NMR (100 MHz,  $\text{CDCl}_3$ )  $\delta$  13.38, 16.11, 116.95, 126.83, 129.52, 131.50, 135.42, 146.80. FT-IR (KBr pellet,  $\text{v}/\text{cm}^{-1}$ ): 3445.57 (br), 2913.75 (s), 2164.70 (w), 1893.84 (w), 1597.64 (w), 1538.90 (s), 1487.55 (s), 1425.65 (s), 1342.89 (m), 1284.94 (w), 1094.51 (s), 1033.10 (s), 1011.04 (s), 967.31 (m), 830.64 (s), 566.15 (s), 516.94 (s).

## 2. MOF syntheses

**Crystallization of 2.** To a glass tube, **1** (3 mg), CuI (6 mg, 0.03 mmol) and acetonitrile (1 mL) were added. The mixture was sonicated for 5 min to form a well-dispersed suspension. Then the tube was sealed with a Teflon cap and heated at 120 °C in an oven for 48 h, followed by natural cooling to room temperature, during which bulk greyish yellow single crystals suitable for single-crystal X ray diffraction were formed. The freshly prepared crystals were wash by acetonitrile (2 mL  $\times$  3) and then dried in air to afford the as-made product of **2** as bulk greyish yellow block (yield of 57 % based on **1**). FT-IR (KBr pellet,  $\text{v}/\text{cm}^{-1}$ ): 3445.57 (br), 2913.75 (s), 1893.84 (w), 1597.64 (w), 1538.90 (s), 1487.55 (s), 1425.65 (s), 1342.89 (m), 1284.94 (w), 1094.51 (s), 1033.10 (s), 1011.04 (s), 967.31 (m), 830.64 (s), 566.15 (s), 516.94 (s).

**Crystallization of 3.** To a glass tube, **1** (3 mg),  $\text{BiBr}_3$  (5 mg) and benzene (1 mL) were added. The mixture was sonicated for 5 min to form a well-dispersed suspension. Then the tube was sealed with a Teflon cap and heated at 85 °C in an oven for 48 h, followed by natural cooling to room temperature, during which bulk orange single crystals suitable for single-crystal X ray diffraction were formed. The freshly prepared crystals were wash by acetonitrile (2 mL  $\times$  3) and then dried in air to afford the as-made product of **3** as bulk orange block (yield of 34 % based on **1**).

### 3. Crystallographic data

**Table S1.** Crystallographic data for the **1**, **2** and **3**.

| Parameter                                    | <b>1</b>                                                                      | <b>2</b>                                                                       | <b>3</b>                                                                                        |
|----------------------------------------------|-------------------------------------------------------------------------------|--------------------------------------------------------------------------------|-------------------------------------------------------------------------------------------------|
| <b>Empirical formula</b>                     | C <sub>36</sub> H <sub>39</sub> Cu <sub>3</sub> N <sub>6</sub> S <sub>3</sub> | C <sub>36</sub> H <sub>39</sub> Cu <sub>4</sub> IN <sub>6</sub> S <sub>3</sub> | C <sub>36</sub> H <sub>39</sub> Cu <sub>3</sub> N <sub>6</sub> S <sub>3</sub> BiBr <sub>3</sub> |
| <b>Formula weight</b>                        | 842.53                                                                        | 1055.54                                                                        | 1330.30                                                                                         |
| <b>Temperature/K</b>                         | 100(2)                                                                        | 100(2)                                                                         | 100(2)                                                                                          |
| <b>Wavelength/Å</b>                          | 0.71073                                                                       | 0.71073                                                                        | 0.71073                                                                                         |
| <b>Crystal system</b>                        | Triclinic                                                                     | Triclinic                                                                      | Triclinic                                                                                       |
| <b>Space group</b>                           | <i>P</i> -1                                                                   | <i>P</i> -1                                                                    | <i>P</i> -1                                                                                     |
| <i>a</i> /Å                                  | 11.7791(14)                                                                   | 7.768(3)                                                                       | 7.5245(10)                                                                                      |
| <i>b</i> /Å                                  | 24.430(3)                                                                     | 16.625(6)                                                                      | 18.260(3)                                                                                       |
| <i>c</i> /Å                                  | 25.856(3)                                                                     | 17.603(7)                                                                      | 18.341(3)                                                                                       |
| <i>α</i> /°                                  | 83.560(2)                                                                     | 75.602(5)                                                                      | 118.114(2)                                                                                      |
| <i>β</i> /°                                  | 84.781(2)                                                                     | 89.685(6)                                                                      | 91.455(2)                                                                                       |
| <i>γ</i> /°                                  | 79.452(2)                                                                     | 86.205(6)                                                                      | 93.877(2)                                                                                       |
| <b>V/Å<sup>3</sup></b>                       | 7249.8(15)                                                                    | 2197.1(14)                                                                     | 2212.9(5)                                                                                       |
| <b>Z</b>                                     | 8                                                                             | 2                                                                              | 2                                                                                               |
| <b>Dc/g·cm<sup>-3</sup></b>                  | 1.544                                                                         | 1.596                                                                          | 1.997                                                                                           |
| <b>μ/mm<sup>-1</sup></b>                     | 1.952                                                                         | 2.788                                                                          | 8.272                                                                                           |
| <b>F(000)</b>                                | 3456                                                                          | 1052.1                                                                         | 1282                                                                                            |
| <b>R<sub>1</sub><sup>a</sup>(I&gt;2σ(I))</b> | 0.0718                                                                        | 0.0921                                                                         | 0.0398                                                                                          |
| <b>wR<sub>2</sub><sup>b</sup>(all data)</b>  | 0.1709                                                                        | 0.2120                                                                         | 0.0899                                                                                          |
| <b>GOF</b>                                   | 1.015                                                                         | 1.030                                                                          | 1.059                                                                                           |

$$^a R_1 = \sum(|F_o| - |F_c|) / \sum|F_o|; \quad ^b wR_2 = (\sum w(F_o^2 - F_c^2)^2 / \sum w(F_o^2)^2)^{1/2}$$

**Table S2.** Selected bond lengths (Å) and bond angles (°) for **1**.

|                                        |          |                 |          |
|----------------------------------------|----------|-----------------|----------|
| Cu(1)–N(1)                             | 1.856(5) | Cu(1)–N(6)      | 1.855(6) |
| Cu(2)–N(2)                             | 1.847(5) | Cu(2)–N(3)      | 1.859(5) |
| Cu(3)–N(4)                             | 1.858(5) | Cu(3)–N(5)      | 1.854(5) |
| N(1)–Cu(1)–N(6)                        | 177.4(2) | N(2)–Cu(2)–N(3) | 174.7(2) |
| N(4)–Cu(3)–N(5)                        | 176.2(2) |                 |          |
| <b>Intramolecular Cu...Cu distance</b> |          |                 |          |
| Cu(1)...Cu(2)                          | 3.250    | Cu(1)...Cu(3)   | 3.175    |
| Cu(2)...Cu(3)                          | 3.176    | Cu(4)...Cu(5)   | 3.213    |
| Cu(4)...Cu(6)                          | 3.243    | Cu(5)...Cu(6)   | 3.151    |
| <b>Intermolecular Cu...Cu distance</b> |          |                 |          |
| Cu(1)...Cu(4)                          | 3.212    | Cu(3)...Cu(6)   | 3.065    |
| Cu(2)...Cu(5)                          | 3.170    |                 |          |

**Table S3.** Selected bond lengths (Å) and bond angles (°) for **2**.

|                                         |                   |                 |                    |
|-----------------------------------------|-------------------|-----------------|--------------------|
| Cu(1)–N(1)                              | 1.888(9)          | Cu(1)–N(6)      | 1.878(9)           |
| Cu(2)–N(2)                              | 1.886(10)         | Cu(2)–N(3)      | 1.872(10)          |
| Cu(3)–N(4)                              | 1.879(10)         | Cu(3)–N(5)      | 1.863(9)           |
| Cu–S                                    | 2.328(4)–2.349(5) | Cu–I            | 2.606(19)–2.635(2) |
| N(1)–Cu(1)–N(6)                         | 179.3(4)          | N(4)–Cu(3)–N(5) | 175.2(4)           |
| N(2)–Cu(2)–N(3)                         | 177.9(4)          | S(2)–Cu(4)–S(3) | 113.22(15)         |
| I–Cu(4)–I                               | 117.56(7)         |                 |                    |
| <b>Intramolecular Cu...Cu distances</b> |                   |                 |                    |
| Cu(1)...Cu(2)                           | 3.256             | Cu(1)...Cu(3)   | 3.185              |
| Cu(2)...Cu(3)                           | 3.232             | Cu(1')...Cu(2') | 3.218              |
| Cu(1')...Cu(3')                         | 3.226             | Cu(2')...Cu(3') | 3.152              |
| <b>Intermolecular Cu...Cu distances</b> |                   |                 |                    |
| Cu(1)...Cu(2')                          | 3.138             | Cu(1')...Cu(2)  | 3.138              |

Symmetry Code: +1–x, +1–y, –z; +1+x, –y, –1+z; –1+x, +y, +1+z



**Table S4.** Selected bond lengths (Å) and bond angles (°) for **3**.

|                                         |             |                 |                     |
|-----------------------------------------|-------------|-----------------|---------------------|
| Cu(1)–N(1)                              | 1.852(4)    | Cu(1)–N(6)      | 1.861(4)            |
| Cu(2)–N(2)                              | 1.858(4)    | Cu(2)–N(3)      | 1.858(4)            |
| Cu(3)–N(4)                              | 1.853(4)    | Cu(3)–N(5)      | 1.851(4)            |
| Bi–S                                    | 3.239–3.299 | Bi–Br           | 2.6325(7)–2.6665(7) |
| N(1)–Cu(1)–N(6)                         | 178.3(2)    | N(2)–Cu(2)–N(3) | 177.47(19)          |
| N(4)–Cu(3)–N(5)                         | 172.40(19)  | Br–Bi–Br        | 92.67(2)–95.15(2)   |
| S–Bi–S                                  | 89.58       |                 |                     |
| <b>Intramolecular Cu...Cu distances</b> |             |                 |                     |
| Cu(1)...Cu(2)                           | 3.286       | Cu(1)...Cu(3)   | 3.176               |
| Cu(2)...Cu(3)                           | 3.170       | Cu(1')...Cu(2') | 3.218               |
| Cu(1')...Cu(3')                         | 3.226       | Cu(2')...Cu(3') | 3.152               |
| <b>Intermolecular Cu...Cu distances</b> |             |                 |                     |
| Cu(1)...Cu(2')                          | 2.987       | Cu(1')...Cu(2)  | 2.987               |

Symmetry Code: +1–x, +2–y, +1–z; –x, +2–y, +2–z

#### 4. Additional Figures

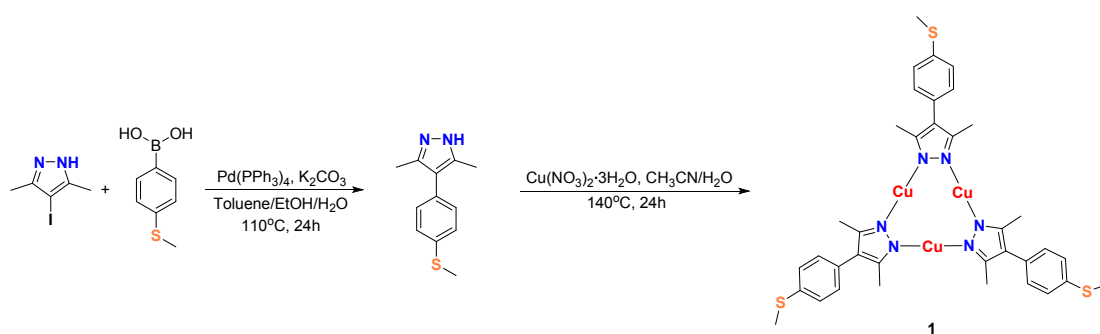**Fig. S1** The synthetic route for **1**.

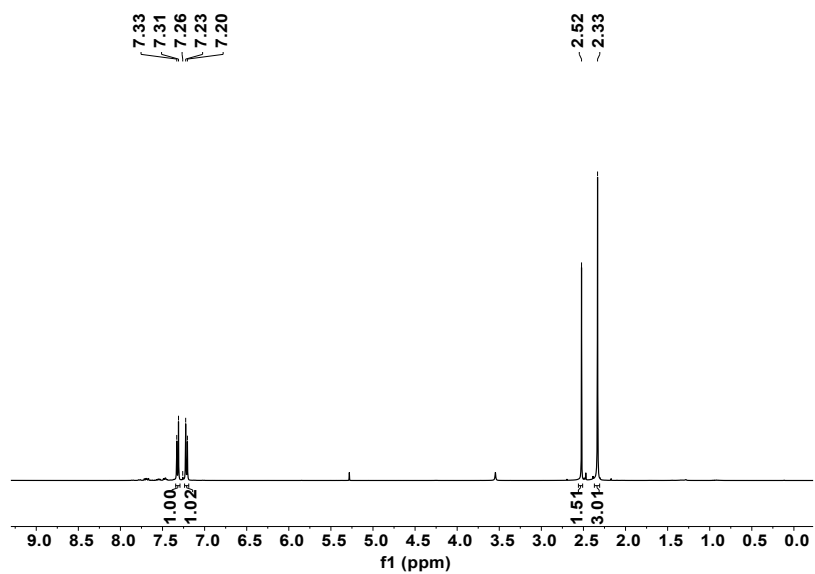

**Fig. S2** The  $^1\text{H}$  NMR spectrum of compound HL in  $\text{CDCl}_3$ .

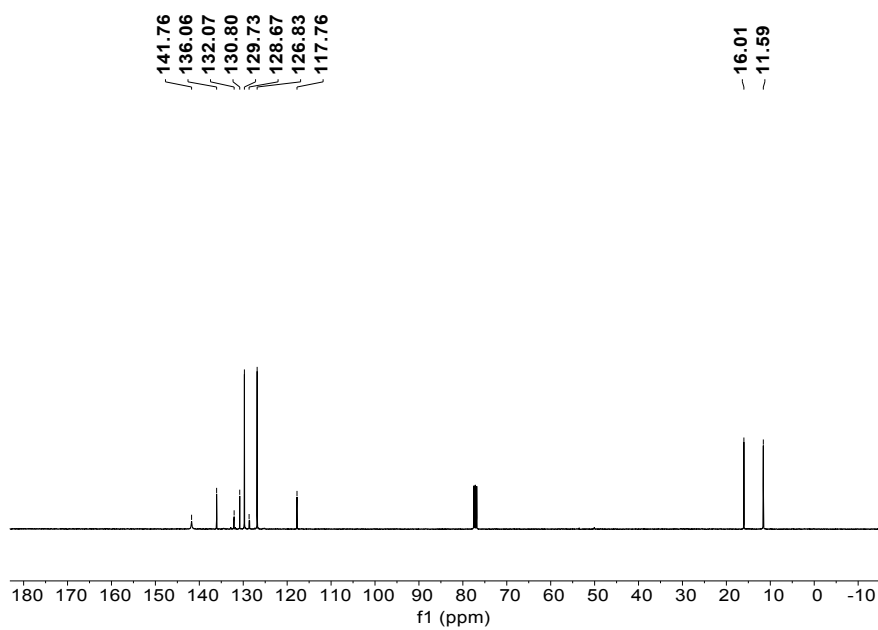

**Fig. S3** The  $^{13}\text{C}$  NMR spectrum of compound HL in  $\text{CDCl}_3$ .

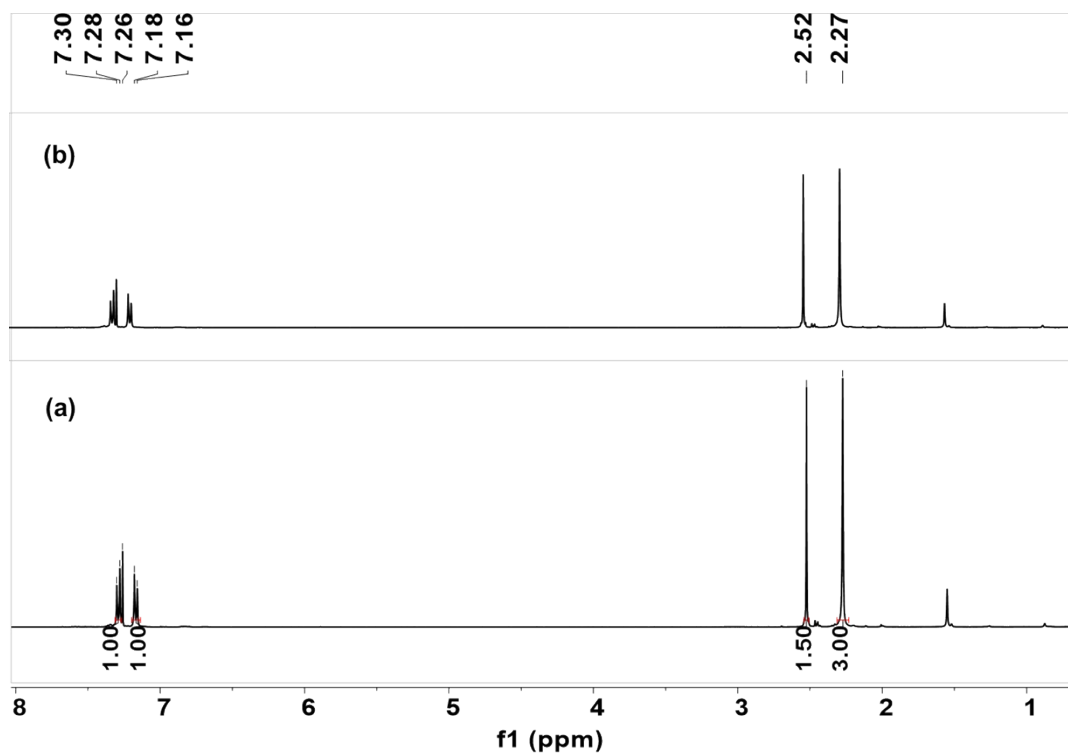

**Fig. S4** The  $^1\text{H}$  NMR spectrum of (a) **1** in  $\text{CDCl}_3$  and (b) the same sample standing for two days.

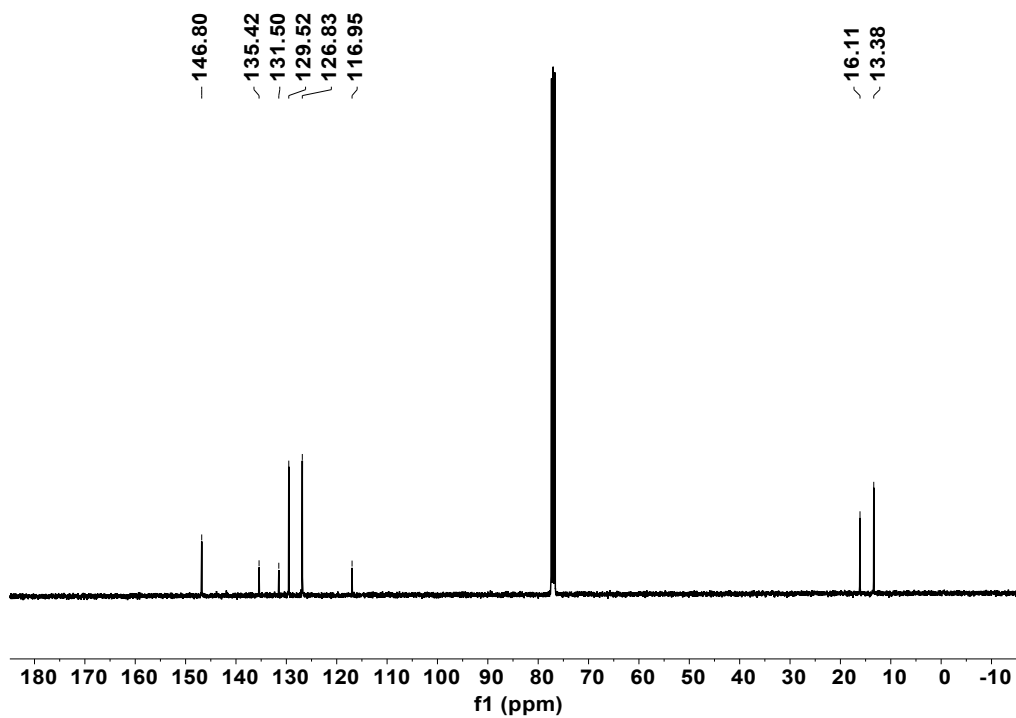

**Fig. S5** The  $^{13}\text{C}$  NMR spectrum of **1** in  $\text{CDCl}_3$ .

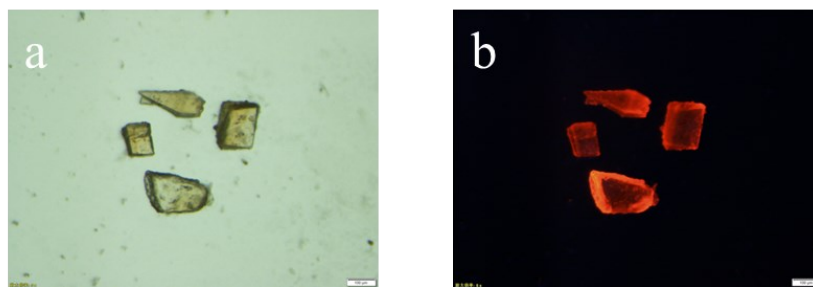

**Fig. S6** Photographs of an as-made sample of **1** (a) under ambient light and (b) in dark upon 365-nm UV irradiation.

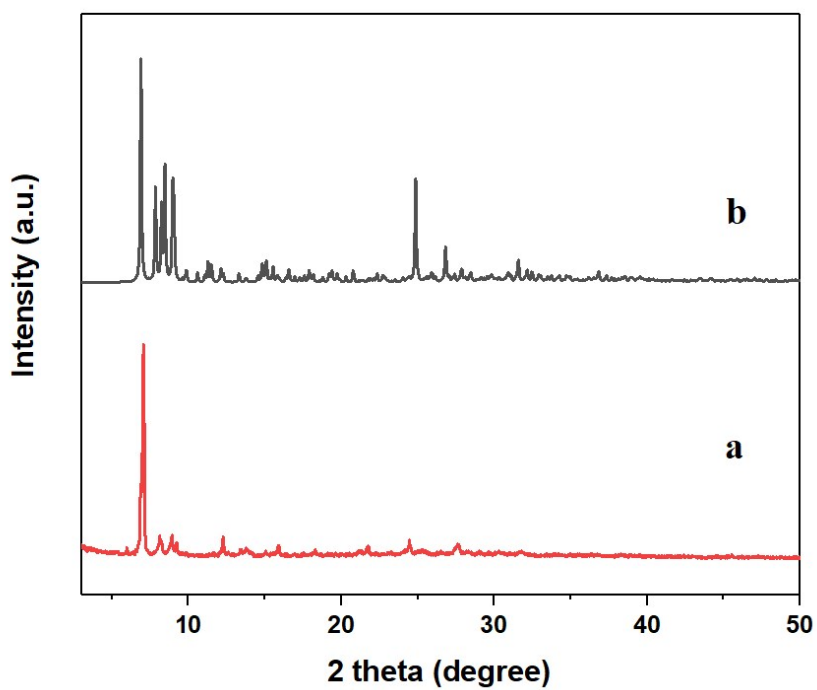

**Fig. S7** PXRD patterns (Cu  $K\alpha$ ,  $\lambda = 1.5418 \text{ \AA}$ ) of (a) an as-made sample of **1**; (b) a simulation from the single crystal structure of **1**.

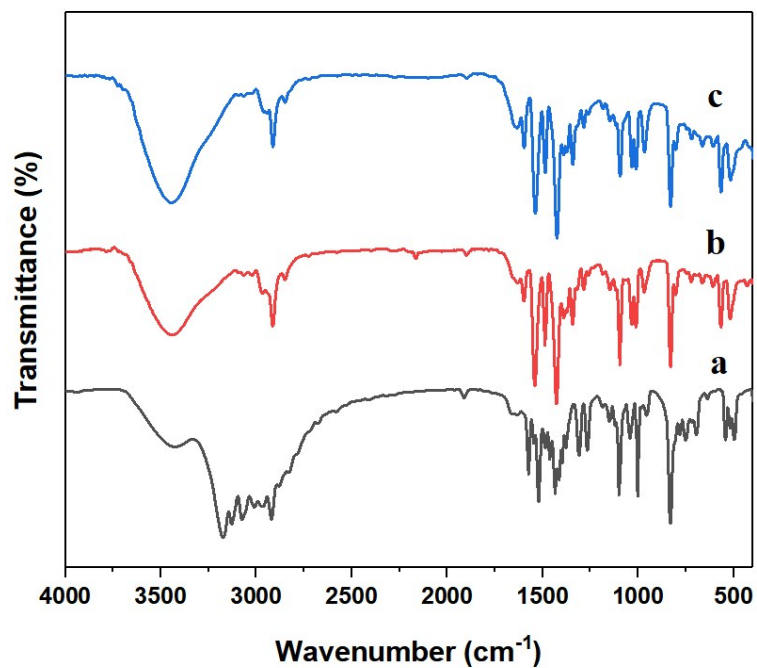

**Fig. S8** The FT-IR spectra of (a) the ligand HL, (b) an as-made sample of **1**, (c) an as-made sample of **2**.

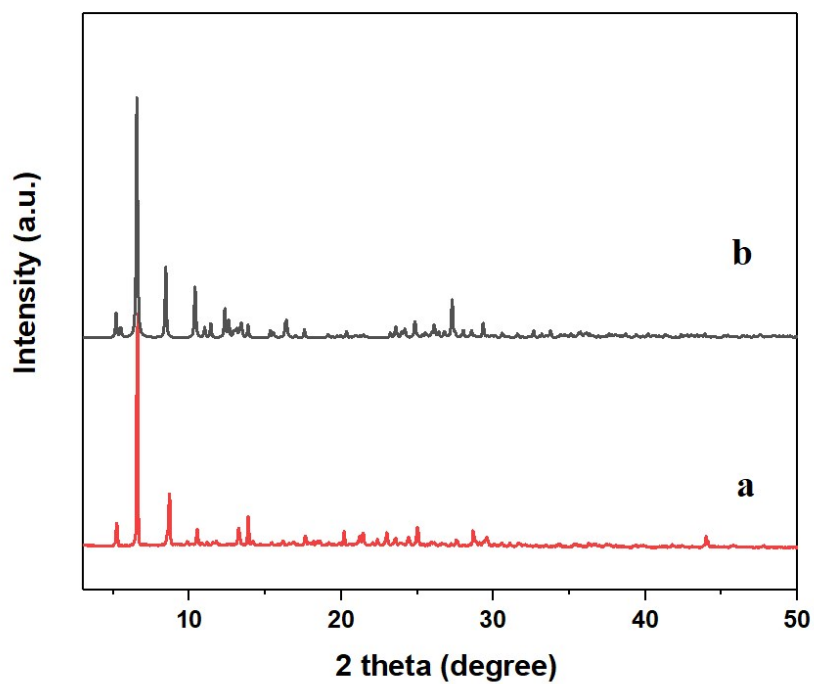

**Fig. S9** PXRD patterns (Cu K $\alpha$ ,  $\lambda = 1.5418 \text{ \AA}$ ) of (a) an as-made sample of **2**; (b) a simulation from the single crystal structure of **2**.

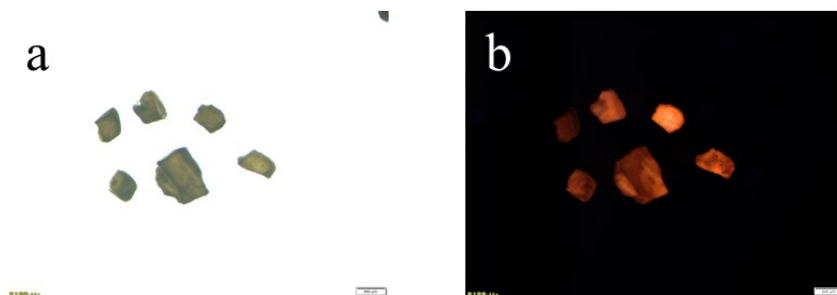

**Fig. S10** Photographs of an as-made sample of **2** (a) under ambient light and (b) in dark upon 365-nm UV irradiation.

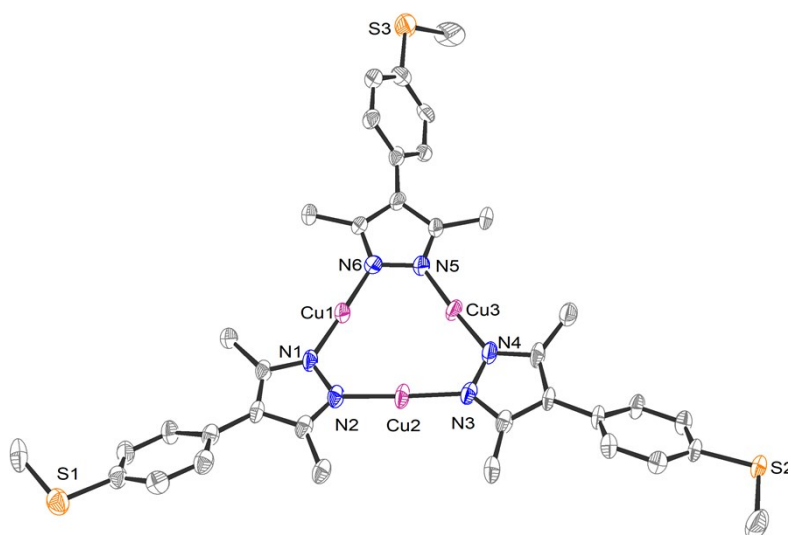

**Fig. S11** Complex **1** shown by ORTEP diagram of 50% probability with H atoms omitted for clarity (Copper: orchid; Nitrogen: blue; Carbon: grey; Sulfur: orange).

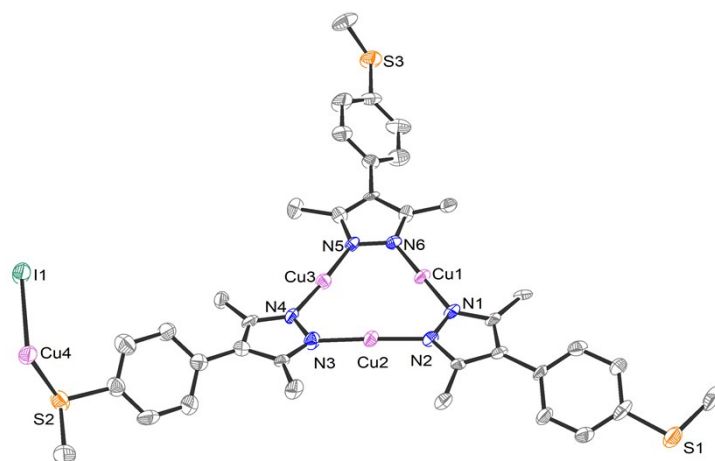

**Fig. S12** The asymmetric unit of **2** shown by ORTEP diagram of 50% probability with H atoms omitted for clarity (Copper: orchid; Nitrogen: blue; Carbon: grey; Sulfur: orange; Iodine: sea green).

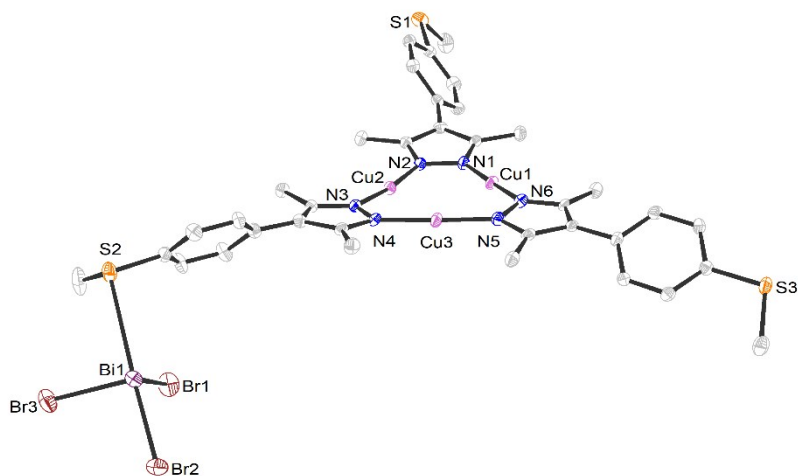

**Fig. S13** The asymmetric unit of **3** shown by ORTEP diagram of 50% probability with H atoms omitted for clarity (Copper: orchid; Nitrogen: blue; Carbon: grey; Sulfur: orange; Bismuth: dark purple; Bromine: brown).

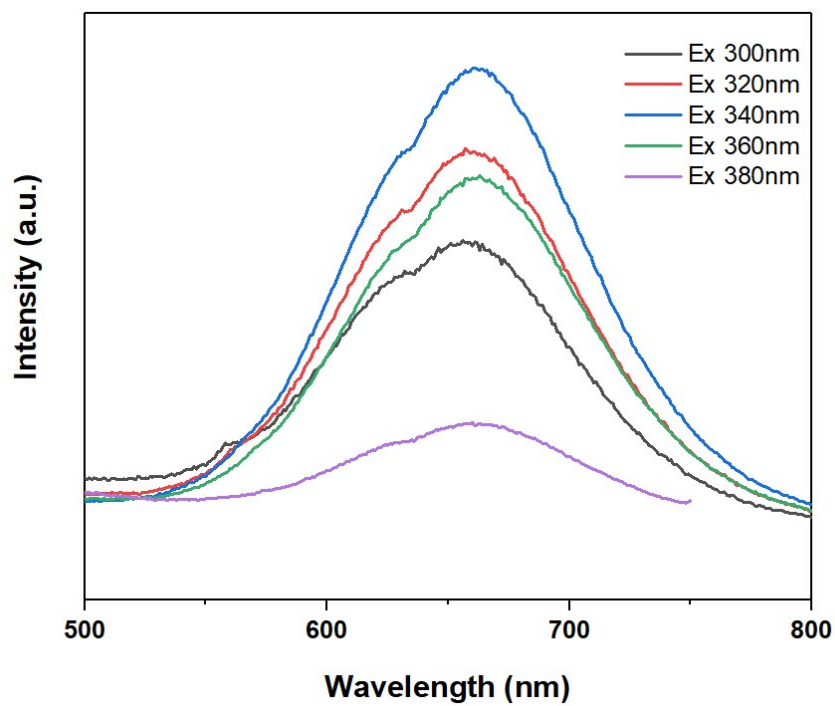

**Fig. S14** Room temperature emission spectra of **1** in the solid state ( $\lambda_{\text{ex}} = 300\text{--}380$  nm).

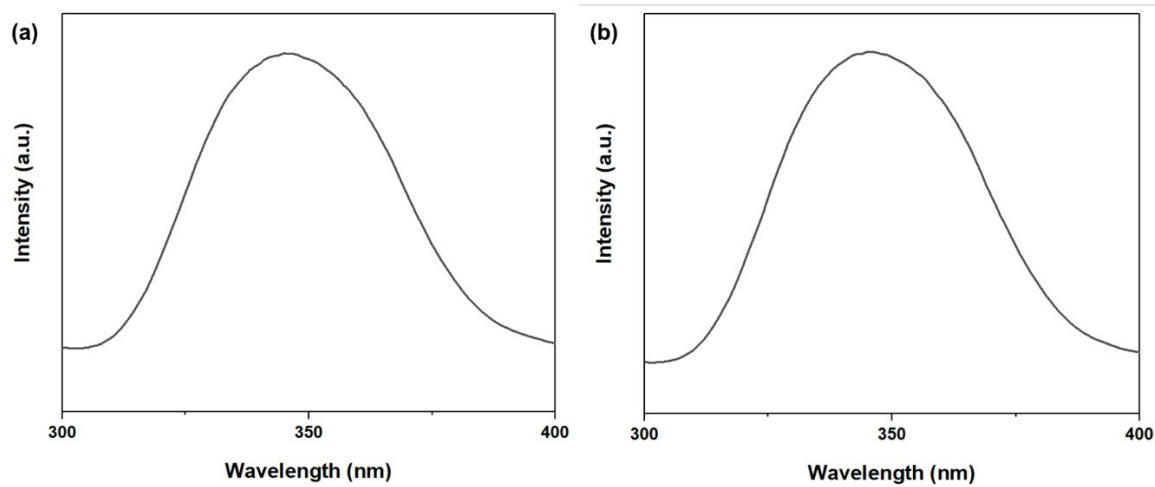

**Fig. S15** Room temperature excitation spectra of **1** in the solid state ( $\lambda_{\text{em}} = 630$  and  $660$  nm for a and b).



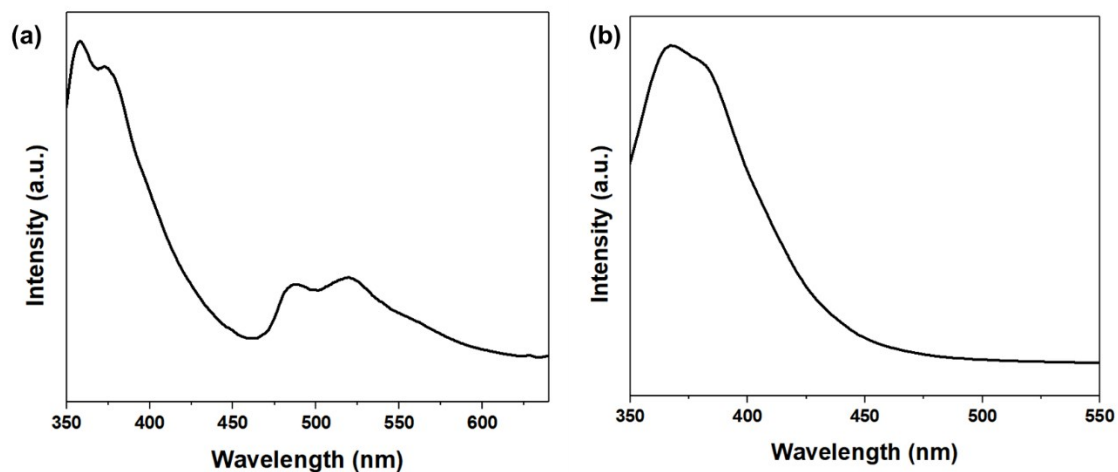

**Fig. S16** Room temperature emission spectra of (a) the ligand HL in the solid state ( $\lambda_{\text{ex}} = 330$  nm) (b) HL in CHCl<sub>3</sub>, [HL] = 2 mg/mL ( $\lambda_{\text{ex}} = 330$  nm).

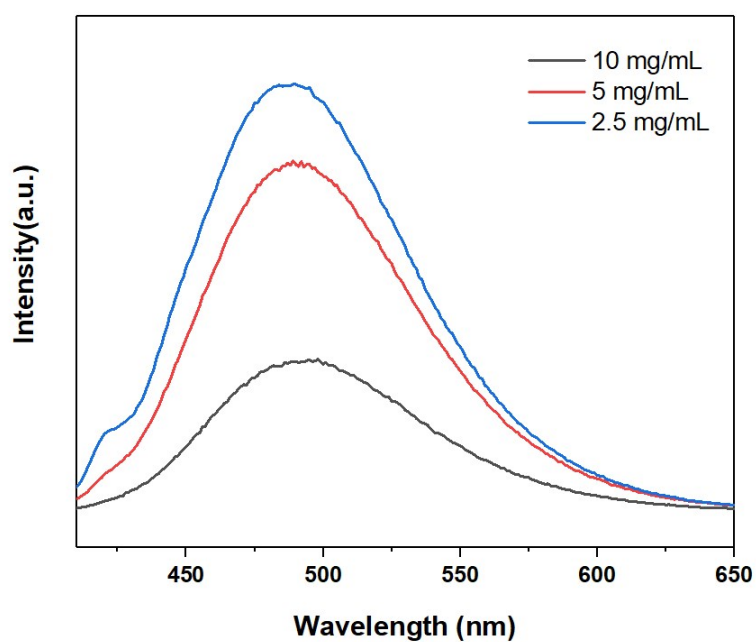

**Fig. S17** Room temperature emission spectra of **1** in CHCl<sub>3</sub>, ( $\lambda_{\text{ex}} = 390$  nm for [**1**] of 10, 5, 2.5 mg/mL)

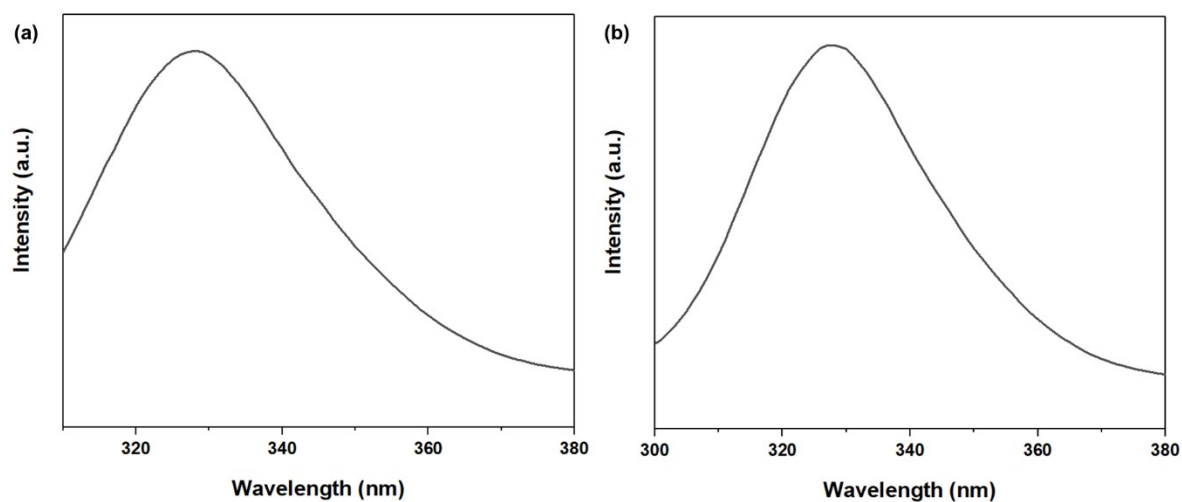

**Fig. S18** Room temperature excitation spectra of **2** in the solid state ( $\lambda_{\text{em}} = 620$  and  $650$  nm for a and b).

## 5. References

1. G. M. Sheldrick, SHELXTL, v. 6.14 Structure Determination Software Suite; Bruker AXS: Madison, WI, 2003.
2. L. J. Farrugia, *J. Appl. Cryst.*, 2012, **45**, 849–854.
